# Supplementary material for: Experimental Cross-Species Infection of Common Marmosets by Titi Monkey Adenovirus
Source: PubMed Central journal article supplement (PMC3722195; doi:10.1371/journal.pone.0068558), 2013-07-24
Supplement: pone.0068558.s001.pdf [file pone.0068558.s001.pdf]

| <b>TMA<sub>AdV</sub> Pneumonia</b>                                   | <b>3202 C→G Mutation</b> | <b>Confirmation by Sequencing</b> |
|----------------------------------------------------------------------|--------------------------|-----------------------------------|
| serum sample from dead titi monkey with TMA <sub>AdV</sub> pneumonia | absent                   | 1 of 1 (direct sequencing)        |
| BSC-1 supernatant, passage 1                                         | absent                   | 1 of 1 (direct sequencing)        |
| A549 supernatant, passage 4                                          | absent                   | 3 of 3 (cloning → sequencing)     |
| A549 supernatant, passage 7                                          | present                  | 6 of 6 (cloning → sequencing)     |
| A549 supernatant, passage 10                                         | present                  | 9 of 9 (cloning → sequencing)     |
| A549 supernatant, passage 13                                         | present                  | 12 of 12 (cloning → sequencing)   |
| marmoset 29012, nasal swab, day 2                                    | present                  | 24 of 24 (cloning → sequencing)   |
| marmoset 29012, nasal swab, day 31                                   | present                  | 5 of 5 (cloning → sequencing)     |
| marmoset 29019, nasal swab, day 2                                    | present                  | 7 of 7 (cloning → sequencing)     |
| marmoset 29020, nasal swab, day 2                                    | present                  | 7 of 7 (cloning → sequencing)     |

**Table S1. Presence or absence of the 3202 C→G mutation in passaged TMA<sub>AdV</sub>**
