# Supplementary material for: Experimental Cross-Species Infection of Common Marmosets by Titi Monkey Adenovirus
Source: PubMed Central journal article supplement (PMC3722195; doi:10.1371/journal.pone.0068558), 2013-07-24
Supplement: pone.0068558.s002.pdf [file pone.0068558.s002.pdf]

| Category                              | Scoring Criteria                                                                                                                                                              |
|---------------------------------------|-------------------------------------------------------------------------------------------------------------------------------------------------------------------------------|
| Weight loss                           | 0: no change from baseline 2: 5–10%↓ 3: 11–15%↓<br>4: 16 – 20%↓                                                                                                               |
| Temperature / fever                   | 0: no change from baseline 1: >2°F 2: >3°F 4: >5°F                                                                                                                            |
| Responsiveness                        | 0: active 2: mild unresponsiveness, becomes active when approached 3: moderate unresponsiveness, lethargic (requires prodding), weakness 5: severe unresponsiveness, moribund |
| Recumbency                            | 0: active 1: occasional prostration 2: persistent prostration but rises when approached 5: prostrate                                                                          |
| Activity:                             | 0 = normal, active and alert 3 = abnormal, reduced activity                                                                                                                   |
| Dyspnea                               | 0: normal breathing 3: labored 5: agonal                                                                                                                                      |
| Petechiae or rash                     | 0: none present 3: petechiae or rash present                                                                                                                                  |
| Bleeding at venipuncture site         | 0: none 3: present                                                                                                                                                            |
| Bleeding other than venipuncture site | 0: none 3: present                                                                                                                                                            |
| Nasal discharge                       | 0: not present 3: visible discharge (copious)                                                                                                                                 |
| Eyes                                  | 0: normal 1: discharge 3: partially closed 4: closed                                                                                                                          |
| Cubes eaten                           | 0: ate 5-4 1: ate 4-3 2: ate 3-2 3: ate 2-1 4: ate 0-1 5: none                                                                                                                |
| Stool                                 | 0: normal 2: diarrhea 4: reduced volume 5: no stool present                                                                                                                   |
| Fluid intake                          | 0: drinking 2: reduced intake 3: not drinking                                                                                                                                 |
| Dehydration (skin tent)*              | 0: test not done 1: 3 secs 3: 4 secs and up                                                                                                                                   |
| TOTAL **                              |                                                                                                                                                                               |

\* Skin tent test is performed during sedation time points.

\*\* Total clinical score is determined by adding up all clinical scores by category. If total score is >20, animal is considered “terminally ill” and should be euthanized

**Table S2. Scoring system used for assessing clinical symptoms in marmosets experimentally infected with TMAV**
