# Supplementary material for: Experimental Cross-Species Infection of Common Marmosets by Titi Monkey Adenovirus
Source: PubMed Central journal article supplement (PMC3722195; doi:10.1371/journal.pone.0068558), 2013-07-24
Supplement: pone.0068558.s003.pdf [file pone.0068558.s003.pdf]

| Name                      | Sequence                   | Purpose                                       |
|---------------------------|----------------------------|-----------------------------------------------|
| TMAV-F                    | GTGACGTCATAGTTGTGGTC       | real-time qPCR screening for TMAV             |
| TMAV-R                    | CTTCGAAGGCAACTACGC         | real-time qPCR screening for TMAV             |
| Marmoset-GAPDH-300F       | CGAGATCCCTCCAAAATCAA       | assessing quality of nucleic acid extractions |
| Marmoset-GAPDH-500R       | TGACGATCTTGAGGCTGTTG       | assessing quality of nucleic acid extractions |
| TMAV-hexon-inner-1896F*   | CGCCACCAACGTGCCCATCT       | nested PCR screening for TMAV                 |
| TMAV-hexon-inner-2088R*   | GATGGAGACGCGGCGGAAGG       | nested PCR screening for TMAV                 |
| TMAV-hexon-outer-1882F*   | CCTATCCCGGCCAACGCCAC       | nested PCR screening for TMAV                 |
| TMAV-hexon-outer-2171R*   | CCGTCCACGGCCCGTTTGAT       | nested PCR screening for TMAV                 |
| HQ913600-E1B55Kfrag-3138F | GAGTGTTTGTGCTTTTTACTGTGCCG | assessing 3202 C→G mutation                   |
| HQ913600-E1B55Kfrag-3272R | GATGTGGATGGTACGCAGGGTCT    | assessing 3202 C→G mutation                   |

**Table S3. PCR primers used in this study.**

\*Conditions for the first-round 25  $\mu$ L nested PCR reaction using TaKaRa Ex Taq<sup>TM</sup> polymerase (Takara Bio, Mountain View, CA) were 35 cycles of 98°C for 10 s, 56°C for 30 s, and 72°C for 30 s. After the first-round reaction, a 0.5  $\mu$ L aliquot was used as the template for the second-round reaction at the same PCR cycling conditions.
